# Supplementary material for: Tailoring ionomer distribution in the catalyst layer via heteroatom-functionalization toward superior PEMFC performance
Source: Royal Society of Chemistry journal article supplement (doi:10.1039/d3cc03610c), 2023-01-01
Supplement: d3cc03610c1.pdf [file d3cc03610c1.pdf]

# Tailoring ionomer distribution in the catalyst layer via heteroatom-functionalization toward superior PEMFC performance

Dianding Sun,<sup>a,b</sup> Zhong Zhao,<sup>b,a</sup> Meng Jin,<sup>\*,a,b</sup> and Haimin Zhang<sup>\*,a,b</sup>

<sup>a</sup>. Key Laboratory of Materials Physics, Centre for Environmental and Energy Nanomaterials, Anhui Key Laboratory of Nanomaterials and Nanotechnology, Institute of Solid State Physics, HFIPS, Chinese Academy of Sciences, Hefei 230031, China. E-mail: zhanghm@issp.ac.cn; mj1992@mail.ustc.edu.cn

<sup>b</sup>. University of Science and Technology of China, Hefei 230026, China

\* Corresponding author

## 1. Experimental

### 1.1 Synthesis of Pt<sub>3</sub>Co/O-C

2 g of commercial 40 wt.% Pt<sub>3</sub>Co/C (SSAC-4001) was mixed with 100 mL 1 M HNO<sub>3</sub> in a 250 mL flask. Then, the mixed solution was immersed in a pre-heated 70°C water bath and stirred for 2 h. After that, the reaction solution was filtered and washed with water until the filtrate became neutral. The obtained powder was dried in a vacuum oven at 80°C for 12 hours. Then, the obtained samples were heated at 5% H<sub>2</sub>/Ar atmosphere and 300°C for 3h and denoted as Pt<sub>3</sub>Co/O-C.

### 1.2 Synthesis of Pt<sub>3</sub>Co/S-C

2 g of commercial 40 wt.% Pt<sub>3</sub>Co/C (SSAC-4001) was mixed with 5 g thiourea and 10 g deionized water in a 50 ml mill pot. The pot was ground in a planetary ball mill at 1000 rpm for 2 h. Then, the slurry was turned into solid powder through a freeze-dryer. Finally, the obtained solid powder was heated at 5% H<sub>2</sub>/Ar atmosphere and 300°C for 3h and washed twice with water. The obtained catalyst is denoted as Pt<sub>3</sub>Co/S-C.

### 1.3 Synthesis of Pt<sub>3</sub>Co/N-C

2 g of commercial 40 wt.% Pt<sub>3</sub>Co/C (SSAC-4001) was mixed with 5 g urea and 10 g deionized water in a 50 ml mill pot. The pot was ground in a planetary ball mill at 1000 rpm for 2 h. Then, the slurry was turned into solid powder through a freeze-dryer. Finally, the obtained solid powder was heated at 5% H<sub>2</sub>/Ar atmosphere and 300°C for 3h and washed twice with water. The obtained catalyst is denoted as Pt<sub>3</sub>Co/N-C.

#### 1.4 Morphological and structural characterization

The X-ray diffraction (XRD) patterns were obtained by a Rigaku D/max-2500B2+/PC powder XRD, using K $\alpha$  radiation ( $\lambda = 1.5406 \text{ \AA}$ ) in a  $2\theta$  angle range 5-90° at room temperature. The size of the nanoparticles was calculated according to Scherrer Equation (1):

$$D = \kappa \lambda / B \cos \theta \quad (1)$$

where D is the average size of the grain perpendicular to the direction of the grain plane (nm). B is the half-height width of the diffraction peak (rad). K is Scherrer's constant (0.89).  $\theta$  is the diffraction Angle.  $\lambda$  is the X-ray wavelength (0.154056 nm). Transmission electron microscopy (TEM) and high-resolution transmission electron microscope (HRTEM) (FEI TecnaiG2F20) were performed to evaluate the crystal structure. The X-ray photoelectron spectroscopy (XPS) was carried out by Thermo Electron Corporation ESCALAB 250 XPS spectrometer.

#### 1.5 Ring-disk electrode (RDE) measurements

RDE measurements were performed using a CHI Electrochemical Station (Model 760) in a three-electrode electrochemical cell at room temperature. Ag/AgCl was used as a reference electrode and Pt foil was used as a counter electrode. In this work, all measured potentials were converted to a reversible hydrogen electrode (RHE) according to Equation (2).

$$E(\text{RHE}) = 0.059 * \text{pH} + 0.098 + E(\text{Ag}/\text{AgCl}) \quad (2)$$

where RHE is the reversible hydrogen electrode and Ag/AgCl is the reference electrode.

The catalyst ink was prepared by sonicating the mixture of 5 mg catalyst and 40  $\mu\text{L}$  (5 wt%) Nafion in 5 mL isopropanol. Then, the ink was drop-coated onto the working electrode (a glassy carbon disk with a diameter of 5.0 mm) with Pt loading of 15-20  $\mu\text{g cm}^{-2}$  and dried at room temperature

in air. After drying, the catalysts were electrochemically activated by cyclic voltammetry (CV) scanning between 0.06 and 0.8 V at  $50 \text{ mV s}^{-1}$  in  $\text{N}_2$ -saturated 0.1 M  $\text{HClO}_4$  solution (around 50 cycles). Then the linear scanning voltammetry (LSV) curves were obtained from 0.06 V to 1.0 V at  $5 \text{ mV s}^{-1}$  in  $\text{O}_2$ -saturated 0.1 M  $\text{HClO}_4$  with the rotating speed at 1600 rpm.

### **1.6 Membrane electrode assembly (MEA) preparation**

The cathode catalyst ink was made by mixing the catalysts with the ionomer solution (D2020) and a water-n-propanol solvent mixture (the n-propanol to water ratio was 4), followed by sonicating the dispersion in ice water for 30 min. The ionomer-to-carbon ratio (I/C) of 0.9 was screened to obtain optimal performance. The catalyst-coated-membrane (CCM with an active area of  $25 \text{ cm}^2$ ) was prepared on a Nafion membrane (GORE,  $12 \mu\text{m}$ ) with ultrasonic spray equipment. The Pt loadings of all MEAs at the cathode and anode were controlled to be 0.15 and  $0.05 \text{ mg}_{\text{Pt}} \text{ cm}^{-2}$ , respectively.

### **1.7 Proton exchange membrane fuel cell testing**

Fuel cell tests were performed on the Scribner 850e fuel cell test stand linked with a Scribner 885 potentiostat. After activation, the  $\text{H}_2$ - $\text{O}_2$  polarization curve was set at  $80^\circ\text{C}$ , 100% RH, 0.5 bar, and the stoichiometric ratio of  $\text{H}_2/\text{O}_2$  was set at 1.5/1.5. The  $\text{H}_2$ -air polarization curve was set at  $80^\circ\text{C}$ , 100% RH, 0.5 bar, and the stoichiometric ratio of  $\text{H}_2/\text{O}_2$  was set at three different conditions, as 1.5/1.5, 1.5/2.5, and 1.5/3.5. Tafel plots were used to calculate the mass activity and tested at  $80^\circ\text{C}$ , 100% RH, 0.5 bar,  $\text{H}_2/\text{O}_2$  at flow rates of  $0.2/0.5 \text{ L min}^{-1}$ . Electrochemical surface area (ECSA) was measured using the hydrogen underpotential deposition method and cyclic voltammetry curves were recorded in a range between 0.1 V and 0.8 V vs RHE at  $100 \text{ mV/s}$ .

The accelerated durability test in MEA was carried out using a square wave voltage from 0.6 to 0.95 V with a duration of 3s at each voltage level, according to the US DOE MEA accelerated durability test protocol for catalysts. Each test was run up to 30,000 cycles at  $80^\circ\text{C}$ , 100% RH, with  $\text{H}_2/\text{N}_2$  flow 200/75 sccm for the anode and cathode, respectively.

## 2. Supplemental Figures

**Table. S1.** Particle Size of Pt<sub>3</sub>Co/C, Pt<sub>3</sub>Co/O-C, Pt<sub>3</sub>Co/S-C and Pt<sub>3</sub>Co/N-C.

| Sample                 | Particle Size (nm) |     |
|------------------------|--------------------|-----|
|                        | TEM                | XRD |
| Pt <sub>3</sub> Co/C   | 3.9                | 4.0 |
| Pt <sub>3</sub> Co/O-C | 4.1                | 4.1 |
| Pt <sub>3</sub> Co/S-C | 4.0                | 4.0 |
| Pt <sub>3</sub> Co/N-C | 4.0                | 4.1 |

**Table. S2.** The Pt content of Pt<sub>3</sub>Co/C, Pt<sub>3</sub>Co/O-C, Pt<sub>3</sub>Co/S-C and Pt<sub>3</sub>Co/N-C.

| Sample                 | ICP              |
|------------------------|------------------|
|                        | Pt Content (wt%) |
| Pt <sub>3</sub> Co/C   | 38.6             |
| Pt <sub>3</sub> Co/O-C | 38.2             |
| Pt <sub>3</sub> Co/S-C | 38.6             |
| Pt <sub>3</sub> Co/N-C | 38.4             |

**Table. S3.** Heteroatomic content of Pt<sub>3</sub>Co/C, Pt<sub>3</sub>Co/O-C, Pt<sub>3</sub>Co/S-C and Pt<sub>3</sub>Co/N-C.

| Sample                 | Heteroatomic Content (at%) |      |      |
|------------------------|----------------------------|------|------|
|                        | O                          | S    | N    |
| Pt <sub>3</sub> Co/C   | 0.92                       | 0.61 | 0.79 |
| Pt <sub>3</sub> Co/O-C | 3.22                       | 0.48 | 0.95 |
| Pt <sub>3</sub> Co/S-C | 0.99                       | 1.56 | 0.78 |
| Pt <sub>3</sub> Co/N-C | 0.83                       | 0.59 | 2.96 |

**Table. S4.** ECSA via CO stripping at 20 % RH and 100% RH of Pt<sub>3</sub>Co/C, Pt<sub>3</sub>Co/O-C, Pt<sub>3</sub>Co/S-C, and Pt<sub>3</sub>Co/N-C.

| Sample                 | ECSA <sub>CO-20%RH</sub> (m <sup>2</sup> g <sub>pt</sub> <sup>-1</sup> ) | ECSA <sub>CO-100%RH</sub> (m <sup>2</sup> g <sub>pt</sub> <sup>-1</sup> ) | ECSA <sub>CO-20%RH</sub> / ECSA <sub>CO-100%RH</sub> |
|------------------------|--------------------------------------------------------------------------|---------------------------------------------------------------------------|------------------------------------------------------|
| Pt <sub>3</sub> Co/C   | 8.49                                                                     | 50.73                                                                     | 16.74%                                               |
| Pt <sub>3</sub> Co/O-C | 25.45                                                                    | 60.73                                                                     | 41.91%                                               |
| Pt <sub>3</sub> Co/S-C | 15.85                                                                    | 57.03                                                                     | 27.79%                                               |
| Pt <sub>3</sub> Co/N-C | 32.05                                                                    | 69.35                                                                     | 46.21%                                               |

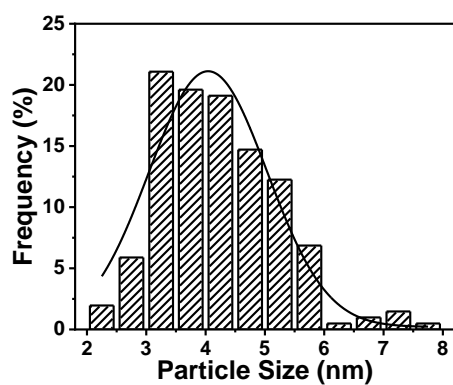

**Fig. S1.** Histogram of the particle size distribution of Pt<sub>3</sub>Co/N-C.

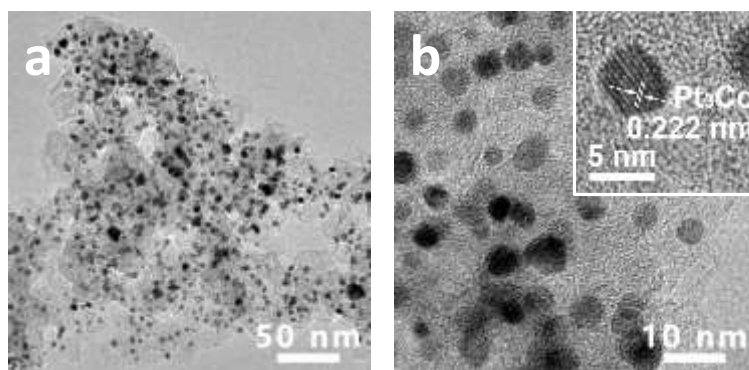

**Fig. S2.** TEM images of Pt<sub>3</sub>Co/C.

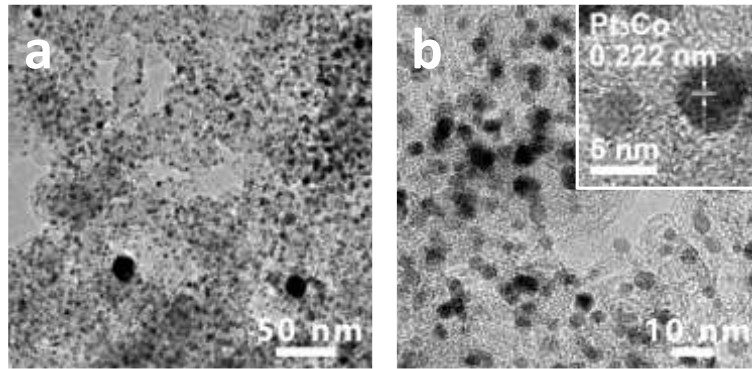

Fig.S3. TEM images of Pt<sub>3</sub>Co/O-C.

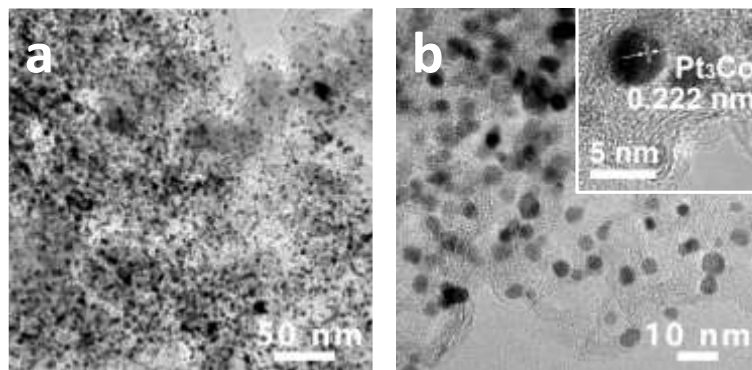

Fig. S4. TEM images of Pt<sub>3</sub>Co/S-C.

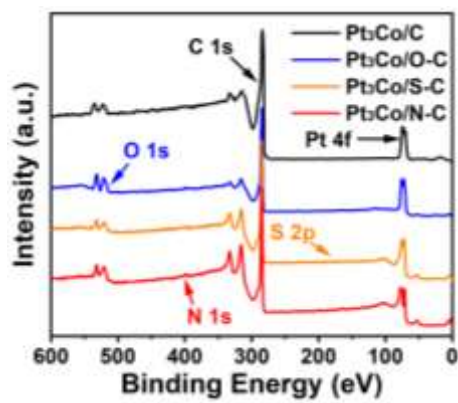

Fig. S5. XPS survey spectrum of Pt<sub>3</sub>Co/C, Pt<sub>3</sub>Co/O-C, Pt<sub>3</sub>Co/S-C, and Pt<sub>3</sub>Co/N-C.

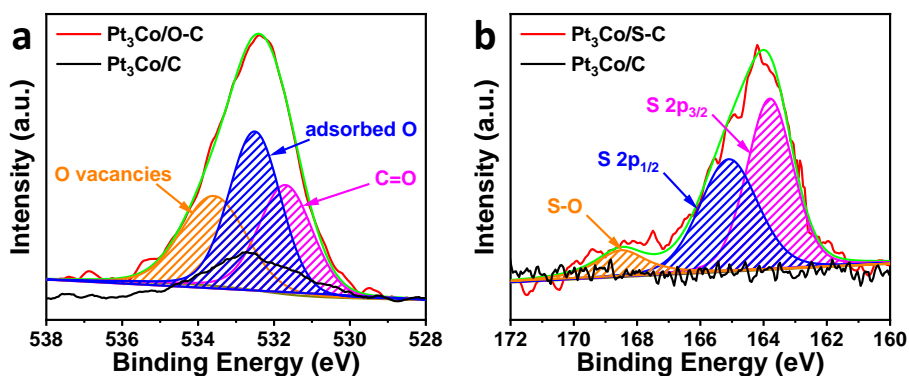

Fig. S6. (a) O 1s spectra of Pt<sub>3</sub>Co/O-C, and Pt<sub>3</sub>Co/C. (b) S 2p spectra of Pt<sub>3</sub>Co/S-C, and Pt<sub>3</sub>Co/C.

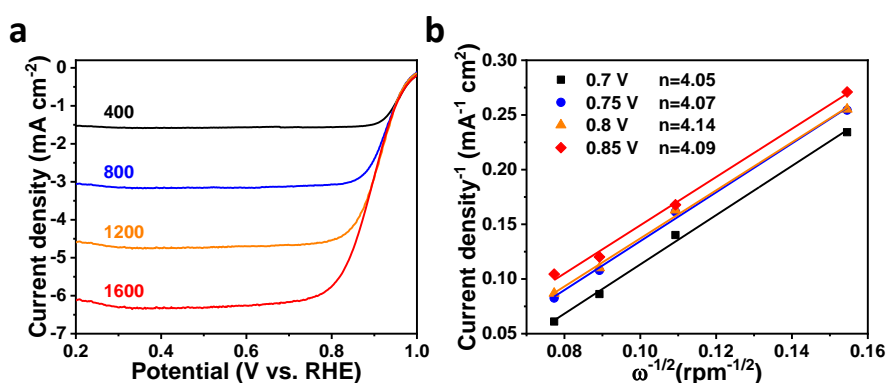

Fig. S7. (a) LSV curves at different rotation rates and (b) the corresponding K–L plots of Pt<sub>3</sub>Co/N-C.

#### The calculation of the number of exchanged electrons (n):

The RDE tests were measured at various rotating speeds from 400 to 1600 rpm with a sweep rate of 5 mV·s<sup>-1</sup>. The electron transfer number (n) and kinetic current density (J<sub>k</sub>) can be calculated from the Koutecky-Levich (K-L) Equation (3) and (4):

$$1/J = 1/J_L + 1/J_k = 1/(B \omega^{1/2}) + 1/J_k \quad (3)$$

$$B = 0.62 n F C_0 D_0^{2/3} V^{-1/6} \quad (4)$$

where J is the measured current density,  $\omega$  is the angular velocity of the disk, n is the electron transfer number, F is the Faraday constant (96485 C mol<sup>-1</sup>), C<sub>0</sub> is the bulk concentration of O<sub>2</sub> (1.26 × 10<sup>-6</sup> mol cm<sup>-3</sup>), D<sub>0</sub> is the diffusion coefficient of O<sub>2</sub> in 0.1 M HClO<sub>4</sub> (1.93 × 10<sup>-5</sup> cm<sup>2</sup> s<sup>-1</sup>), and V is the kinematic viscosity of the electrolyte (0.01 cm<sup>2</sup> s<sup>-1</sup>).

The mass-related kinetic current density (J<sub>k</sub>) of the catalyst at 0.9 V vs. RHE was calculated according to Equation (5):

$$J_k = J \times J_L / ((J_L - J) \times L_{Pt}) \quad (5)$$

where  $J$ ,  $J_L$ , and  $L_{Pt}$  represent the measured current density, the diffusion-limited current density, and Pt loading, respectively. Capacitance-correction and IR-correction were performed for the MA calculation in 0.1 M HClO<sub>4</sub> solution from 0.1 Hz to 10,000 Hz with an amplitude of 5 mV, the initial potential was set as 0.05 V.

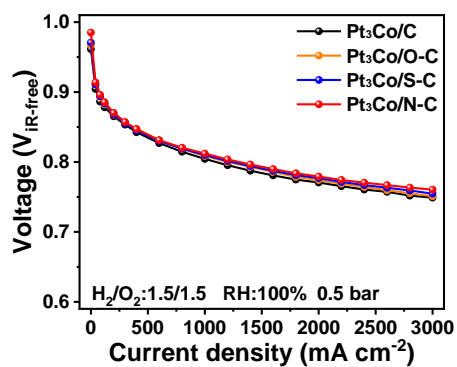

**Fig. S8.** Polarization curves with HFR corrected of Pt<sub>3</sub>Co/C, Pt<sub>3</sub>Co/O-C, Pt<sub>3</sub>Co/S-C, and Pt<sub>3</sub>Co/N-C with O<sub>2</sub> as cathode feed at 1.5 stoichiometric ratios.

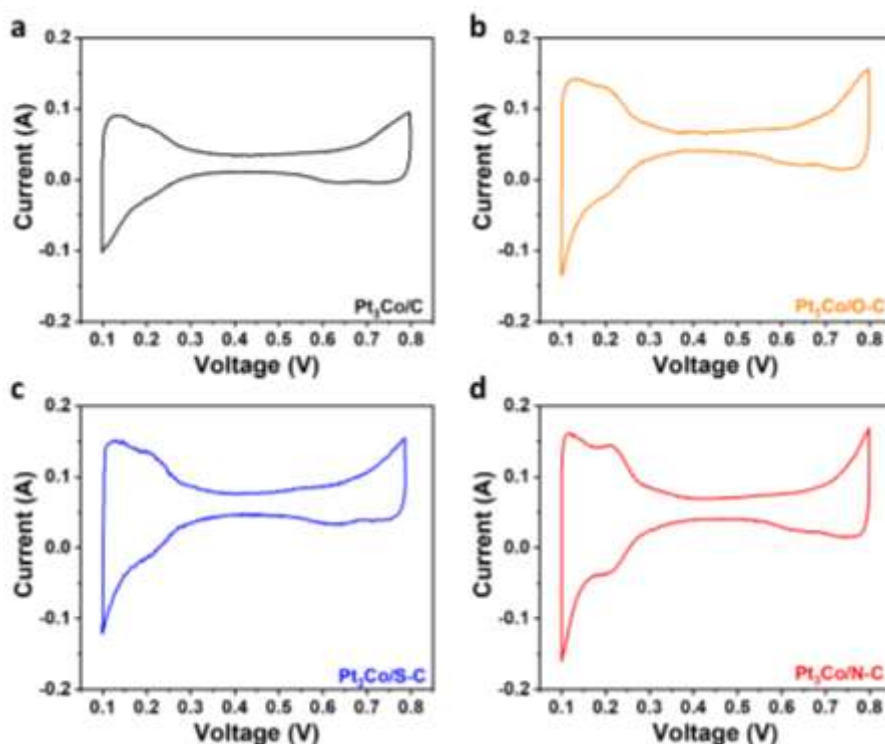

**Fig. S9.** Evaluation of hydrogen underpotential deposition by PEMFC.



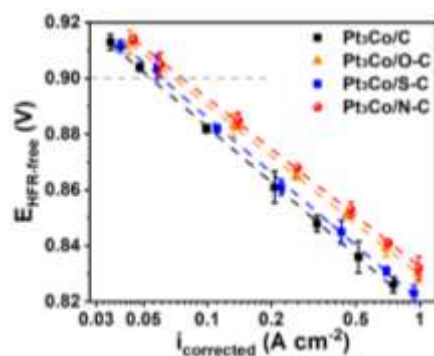

**Fig. S10.** Tafel slopes of Pt<sub>3</sub>Co/C, Pt<sub>3</sub>Co/O-C, Pt<sub>3</sub>Co/S-C, and Pt<sub>3</sub>Co/N-C evaluated by PEMFC at 80°C, 100% RH, 0.5 bar, H<sub>2</sub>/O<sub>2</sub> at flow rates of 0.2/0.5 L min<sup>-1</sup>, and the values of Tafel slopes were calculated at 0.9 V.

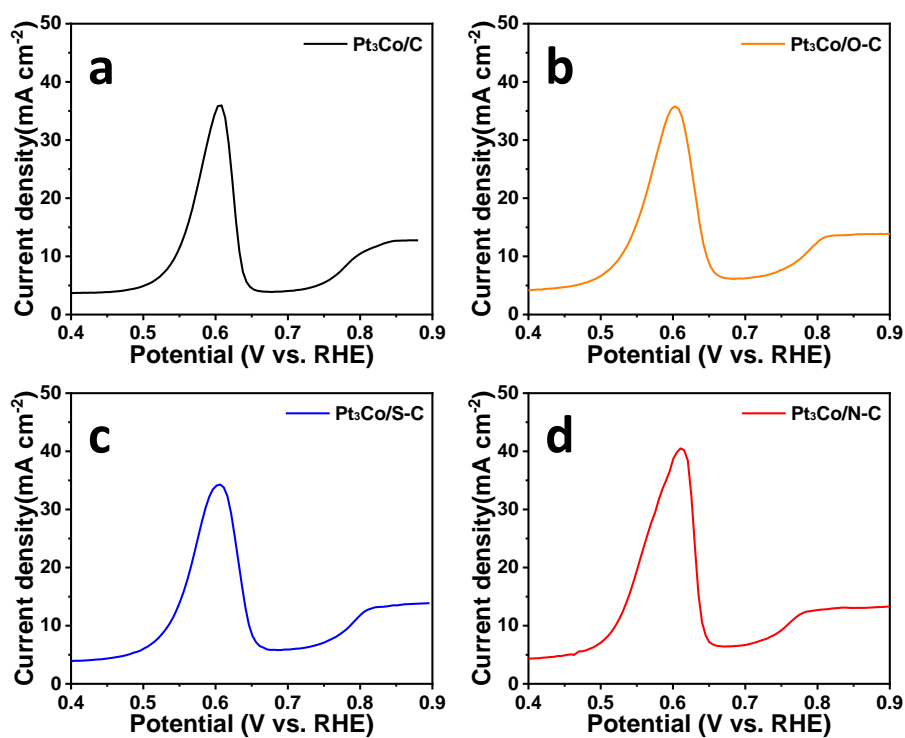

**Fig. S11.** ECSA via CO stripping of (a) Pt<sub>3</sub>Co/C, (b) Pt<sub>3</sub>Co/O-C, (c) Pt<sub>3</sub>Co/S-C, and (d) Pt<sub>3</sub>Co/N-C at 80 °C, 100% RH, 0.5 bar, H<sub>2</sub>/N<sub>2</sub> at flow rates of 0.2/0.005 L min<sup>-1</sup>.

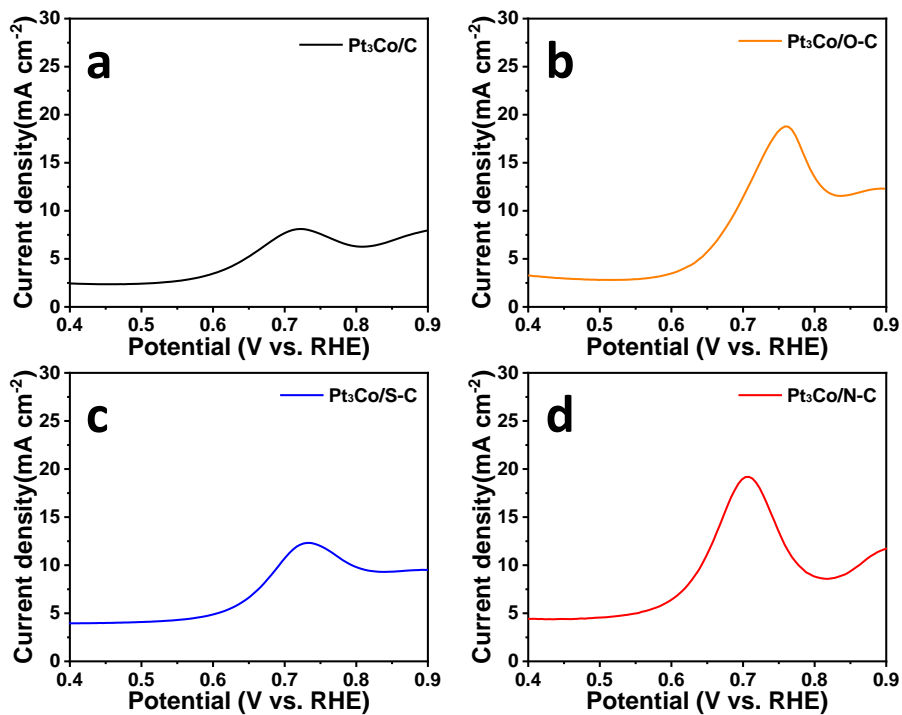

**Fig. S12.** ECSA via CO stripping of (a) Pt<sub>3</sub>Co/C, (b) Pt<sub>3</sub>Co/O-C, (c) Pt<sub>3</sub>Co/S-C, and (d) Pt<sub>3</sub>Co/N-C at 80 °C, 20% RH, 0.5 bar, H<sub>2</sub>/N<sub>2</sub> at flow rates of 0.2/0.005 L min<sup>-1</sup>.

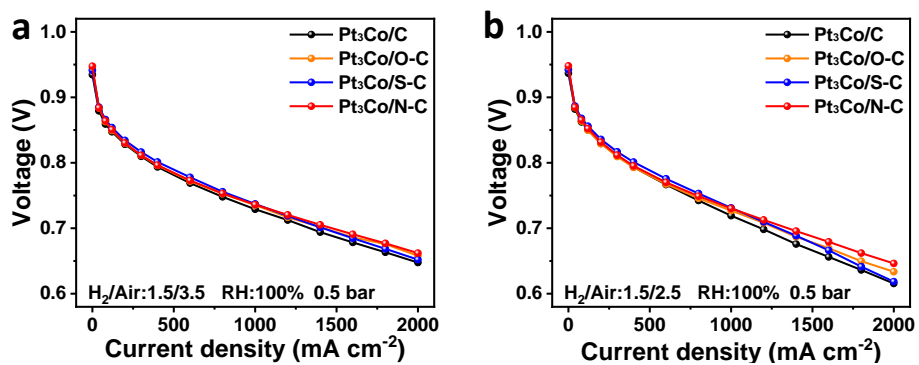

**Fig. S13.** Polarization curves of Pt<sub>3</sub>Co/C, Pt<sub>3</sub>Co/O-C, Pt<sub>3</sub>Co/S-C, and Pt<sub>3</sub>Co/N-C with air as cathode feed at (a) 3.5 and (b) 2.5 stoichiometric ratio.

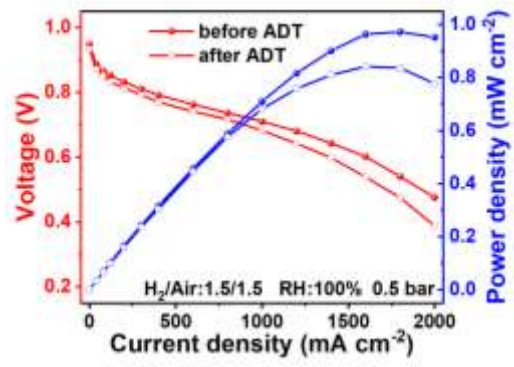

**Fig. S14.** Polarization curves and power density curves of Pt<sub>3</sub>Co/N-C before and after 30000 cycles square wave accelerated stress test.
